# Supplementary material
Source: MDPI journal article supplement (https://www.mdpi.com/2077-1444/9/1/7)
Supplement: s1 [file s1]

# The Annunciation of Solomon

Song of Solomon 3:6-7a, 11 (KJV)  
and John Milton (1608-1674)

for SSATB choir and organ

Stuart Beatch  
(b. 1991)

**Slow and mysterious** (♩ = 52)

Soprano  
Who\_ is this, who\_ is this,

Alto  
Who\_ is this, who\_ is this,

Tenor  
*pp* *lontano*  
Be - hold, be -

Bass  
*pp* *lontano*  
Be - hold, be -

Organ  
*ppp* *sempre*  
Ped. (8' only)

6

who\_ is this that com - eth out of the wil - der-ness like pil-lars of smoke?

who\_ is this that com - eth out of the wil - der-ness like pil-lars of smoke?

who\_ is this that com - eth out of the wil - der-ness like pil-lars of smoke?

hold, he that com - eth like pil - lars of

hold, he that com - eth like pil - lars of

11 *mp* *mf* *poco rit.* *pp*

Who is this, who is this per-fumed with myrrh and frank - in - cense, with all pow-ders of the

Who is this, who is this per-fumed with myrrh and frank - in - cense, with all pow-ders of the

Who is this, who is this with myrrh and frank - in - cense, with all pow-ders of the

*p* smoke. Be - hold, myrrh and frank - in - cense. *mp*

*p* smoke. Be - hold, myrrh and frank - in - cense. *mp*

*poco rit.*

16 *a tempo* *f* *mp* *p*

mer - chant? Be - hold,

mer - chant? Be - hold,

mer - chant? Be - hold,

*mf* Who is this, who is this that com-eth out of the wil-der-ness? *f* *pp* Be -

*mf* Who is this, who is this that com-eth out of the wil-der-ness? *f* *pp* Be -

*a tempo*

22 *mp* *poco rit.* *f* *ff*

Be - hold, be - hold, be - hold: Sol - o - mon!

*mp* *f* *ff*

Be - hold, be - hold, be - hold: Sol - o - mon!

*p* *f* *ff*

Be - hold, be - hold, be - hold: Sol - o - mon!

*mp* *f* *ff*

hold, be - hold, be - hold: Sol - o - mon!

*mp* *f* *ff*

hold, be - hold, be - hold: Sol - o - mon!

*poco rit.*

29 **a tempo**

**a tempo**  
Gt. full  
*ff*  
Sw. (open)  
*mp*  
Ped.

33 (♩ = ♩)

*mp* *mf* *p* *f*

I now see Bone of my Bone, Flesh of my Flesh, my Self be

*mp* *mf* *p* *f*

I now see Bone of my Bone, Flesh of my Flesh, my Self be

*mp* *mf* *p* *f*

I now see Bone of my Bone, Flesh of my Flesh, my Self be

*mp* *mf* *p* *f*

I now see Bone of my Bone, Flesh of my Flesh, my Self be

*p* *mf* *p* *f*

I now see Bone of my Bone, Flesh of my Flesh, my Self be

(♩ = ♩)

Pos.

*pp* *mp* *mf*

Man.

40

*f*

fore me; Wo-man is her name, of Man ex-

*f*

fore me; Wo-man is her name, of Man ex -

*f*

fore me; Wo-man is her name, of Man ex -

*f*

fore me; Wo-man is her name, of Man ex-

*f*

fore me; Wo-man is her name, of Man ex -

Sw.

*mf* *f* *mf*

Ped.

46

*pp* *mf* *ff*

tract - ed, and they shall be one, one Flesh, one Heart; we shall be one Soule.

tract - ed, and they shall be one, one Flesh, one Heart; we shall be one Soule.

tract - ed, and they shall be one, one Flesh, one Heart; we shall be one Soule.

tract - ed, and they shall be one, one Flesh, one Heart; we shall be one Soule.

tract - ed, and they shall be one, one Flesh, one Heart; we shall be one Soule.

Pos.

*pp*

Man.

53

*rit.*

Gt. full

Sw. (open)

*ff* *mp*

*rit.*

Ped.

57 **Freely**

*pp*

Go forth, O ye daugh - ters of Zi - - on,

*pp*

Go forth, O ye daugh - ters of Zi - - on,

*pp*

Go forth, O ye daugh - ters of Zi - - on,

*pp*

Go forth, O ye daugh - ters of Zi - - on,

*pp*

Go forth, O ye daugh - ters of Zi - - on,

**Freely**

*pp*

58 **poco rit.**

*mp*

and be-hold King Sol - o - mon in the day of the glad - ness of his heart.

*mp*

and be-hold King Sol - o - mon in the day of the glad - ness of his heart.

*mp*

and be-hold King Sol - o - mon in the day of the glad - ness of his heart.

*mp*

and be-hold King Sol - o - mon in the day of the glad - ness of his heart.

*mp*

and be-hold King Sol - o - mon in the day of the glad - ness of his heart.

**poco rit.**

*mp*

(Ped.)
