# Supplementary material
Source: MDPI journal article supplement (https://www.mdpi.com/2077-1444/9/1/7)
Supplement: s1 [file s1]

# Hinneni

הַנִּנֵּנִי

For SATB Choir with divisions

Anselm McDonnell



## Preface

Composed by Anselm McDonnell Nov-Dec 2016 for the St. Salvator's Chapel Choir as part of the Theoartistry composers' scheme.

Text produced in collaboration with Margaret McKerron, based on Genesis 3. Hebrew transliteration by Dr. Madhavi Navader.

**Instrumentation:**

SATB choir with divisions

**Duration:** '3:00' c.

**Text:**

Vatigáh mipiró vatochál.

**Pronounced:** (Va-tee-ka mi-peer-row va-toe-chal) 'ch' as in loch  
'mi' as in miss

Where are you?

Where are you Adam?

Where are you Eve?

## Hinneri

**Pronounced:** (Hi-nay-nee) 'hi' as in him

Vatitatén leisháh vaochál.

**Pronounced:** (Va-tee-ta-tayn lay-eesh-ah va-oh-chal) 'ch' as in loch

Who told you you were naked?

Have you eaten from the tree,

Of knowledge, of good and evil?

What is this you have done,

My son?

Hinneni

For whom are you naked?

What is this you have done?

My lord, my God, my Saviour?

Hanging cursed from the tree,

Of wrath, of death?

For me?

Vatipağáchna ene shnehém.

**Pronounced:** (Va-tee-pa-ka-chna ay-nay shne-chem) 'ch' as in loch

Where are you?

Where are you, my Saviour?

My lord, my God, my Saviour?

## Hinneneni



# Hinnení

For the St. Salvator's Chapel Choir

Anselm McDonnell/Margaret McKerron

Anselm McDonnell

$\text{♩} = 80$

**Soprano**

**Alto**

*Each singer whispers this phrase repeatedly and with rhythmic independence. Stop at the dashed line.*

**Tenor**

**Bass**

**ppp**

Vatíqáh mipiró  
vatochál

*Whispered with quiet intensity*

**pp**

**p**

Where are you? \_\_\_\_\_

Va - ti - qáh mi - pi - ró va - to - chál! Va - ti - qáh mi - pi - ró va - to - chál! Va - ti -

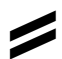

**4**

**S.**

**A.**

**T.**

**B.**

**mp**

**mf**

**mp**

Where are you? \_\_\_\_\_

Where are you? \_\_\_\_\_

**mp**

Where are you Eve? \_\_\_\_\_

**mf**

**p**

**ord.**  
**p** < **mp**

**p** <

qáh mi - pi - ró va - to - chál! Va - ti - qáh mi - pi - ró va - to - chál! Va - ti - qáh!

A - dam? A -

2

*rit.*

*p* *mp* *mf* *p*

S. 8  
Where are you? Where are you Eve?

A. *mp* *mf* *p*  
Where are you Eve?

T. *mp* ord. *mf* *p*  
Where are you Eve?

B. *mp* *mf* *sfz*  
dam? A - dam? A - - dam!

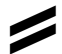

*With trepidation*

10 **Tempo primo**

*pp* Divide Staves

S. Hin - ne - ni.

A. *pp* Divide Staves  
Hin - ne - ni.

T. *pp*  
Hin - ne - ni.

B. *pp* *Whispered*  
Hin - ne - ni. Va - ti - qáh mi - pi - ró va - to -

13 ♩ = 92

S. *mp* *mf*  
Have you ea- ten from the tree?

S. 2 *mp* *mf*  
Have you ea - ten from the tree?

A. *mp* *mf*  
Who told you you were na - ked?

A. 2 *mp* *mf*  
Who told you you were na - ked?

T.  
chál!

B.

17

S. *mp*  
Who told you you were na - ked? Who told

S. 2 *mp*  
Who told you were na - ked? Who told

A. *mp*  
Who told you you were na - ked? Who told you

A. 2 *mp*  
Who told you you were na - ked? Who told you

T. *With warmth* *mp* *mf* *Stagger breathing* *Divide Staves*  
Who told you?

B. *With warmth* *mp* *mf* *ord. Stagger breathing*  
Who told you?

20 *mf* 3 *mp* Join Staves ↘

S. you you were na - ked?

S. 2 *mf* 3 *mp* Join Staves ↗

you you were na - ked?

A. *mf* *mp* *p* Join Staves ↘

you were na - ked?

A. 2 *mf* *mp* *p* Join Staves ↗

you were na - ked?

T. *mp* *mf* 3

Have you eat - en from the

T. 2 *mp*

B. *mp*

Each singer whispers this phrase repeatedly and with rhythmic independence. Stop at the dashed line.

Vatitatén leisháh  
vaochál

23 *p* *mf* *pp*

S. *p* Vatitatén leisháh  
vaochál

A. *mf*

T. *mf* 3

tree? Have you eat - en from the tree?

T. 2 *mf* 3

Have you eat - en from the tree? Have you eat - en from the

B. *mf*

Of know - ledge, of good and e - vil?

Each singer whispers this phrase repeatedly and with rhythmic independence. Stop at the dashed line.

Vatitatén leisháh  
vaochál



26 *ord. mp*

S. Have you eat - en <sup>3</sup> from the tree?

S. 2 *ord. mp* Have you eat - en <sup>3</sup> from the tree?

A. *pp* *mp ord.* Of know - ledge, of

T. <sup>8</sup> Have you eat - en <sup>3</sup> from the tree?

T. 2 <sup>8</sup> tree? *mp* Have you eat - en <sup>3</sup> from the

B. *mp* Of know - ledge, of

28 *mf* *f* Join Staves ↘

S. What is this you have done, my son?

S. 2 *mf* *f* Join Staves ↗

S. 2 What is this you have done, my son?

A. *mf* *f* Join Staves ↘

A. good and e - vil? What have you done, my son?

T. <sup>8</sup> What is this you have done, my son?

T. 2 *mf* *f* Join Staves ↗

T. 2 tree? What is this you have done, my son?

B. *mf* *f*

B. good and e - vil? What have you done, my son?

*With anguish*

31

S. *mp* Hin - - ne - - - ni!

A. *mp* Hin - - ne - - - ni!

T. *mp* Hin - - ne - - - ni!

B. *mp* Hin - - ne - - - ni!

Divide Staves ↗

Divide Staves ↗

33

S. - - - - -

A. *mp* For whom are you

T. *mp* For whom are you *mf* na - ked? Are you na - ked? Join Staves ↘

T. 2 *mp* For whom are you *mf* na - ked? For whom are you na - ked? Join Staves ↗

B. *mf* For whom are you na - ked? For whom are you na - ked?

B. 2 *mf* For whom are you na - ked? For whom are you na - ked?

38

*mf* *f* 7

S. What is this you have done? My Lord, my

A. na - ked? My lord? My lord? What is this you\_

T. For whom are you na - ked? For whom are you na - ked? What is this

B. For whom are you na - ked? My lord? My

B. 2 For whom are you na - ked? My lord? My

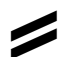

44

*fff* *pp* *Whispered reverently*

S. God, my Sa-viour? Hang-ing cursed from the tree of wrath, of death? For me?

A. \_ have done, my Sa-viour? Hang-ing cursed from the tree of wrath, of death? For me?

T. you have done my Sa-viour? Hang-ing cursed from the tree of wrath, of death? For me?

B. God, my Sa-viour? Hang-ing cursed from the tree of wrath, of death? For me?

B. 2 God, my Sa-viour? Hang-ing cursed from the tree of wrath, of death? For me?

Join Staves ↘

Join Staves ↗

8 rit. . . . . ♩ = 80  
*pp* As before

50

S. *Vatipačáchna ene shnehém*

A. *As before*  
*pp*  
*Vatipačáchna ene shnehém*

T. ord.  
*p*  
 Where are you? Where are you?

B. ord.  
*p*  
 What is this you have done, my God?

54

S. ord.  
*p*  
 Where are you? Where are you my

A. ord.  
*p*  
 Where are you? Where are you?

T. *mp* *p*  
 Where are you?

B. *mp*  
 My lord, my God, my

58 *mf* *p*, rit.

S. Sa - - viour?

A. *mf* *p*,  
My Sa - viour?

T. *mp* *mf* *p*, *pp*  
Where are\_ you?\_ Sa - viour?\_ Hin - ne - ni.

B. *mf* *p*, *pp*  
Sa - - - viour?\_ Hin - ne - ni.
