# Supplementary material
Source: MDPI journal article supplement (https://www.mdpi.com/2077-1444/9/1/7)
Supplement: s1 [file s1]

# GOD CALLS SAMUEL

---

Seán Doherty

2017

Sop. solo, SATB & Organ

## PROGRAMME NOTE

In 1 Samuel 3, the boy Samuel hears his name being called during his nightly task of tending the lamp in the temple at Shiloh. Samuel thinks he is being summoned by his guardian, Eli, the high priest of the temple, and answers ‘Here I am!’. Eli tells Samuel that this is God’s voice and to respond with the words, ‘Speak, for your servant hears’, whereupon God speaks to Samuel and promises to destroy the house of Eli because his wicked sons had blasphemed and Eli failed to restrain them. This setting takes the viewpoint of the boy Samuel, who is traumatised by this nightmarish prophecy to the extent that he is afraid to tell Eli about it in the morning.

## TEXT

| Text                       | Hebrew                          | Transliteration                     | Translation                              |
|----------------------------|---------------------------------|-------------------------------------|------------------------------------------|
| Samuel                     | שְׁמוּאֵל                       | šə-mū-’èl                           | <i>God hears / the one who hears God</i> |
| Eli                        | אֵלִי                           | ‘ê-lî                               | <i>My God</i>                            |
| Hineni                     | הִנְנִי                         | hine-nî!                            | <i>Here I am!</i>                        |
| Daber ki shomea<br>abdecha | דַּבֵּר, כִּי שֹׁמֵעַ עַבְדְּךָ | Dab-bêr, kî šhō-mê-<br>a‘ aḇ-de-ḱā. | <i>Speak, for your<br/>servant hears</i> |

## PERFORMANCE NOTES

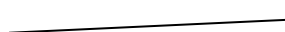

*glissando*

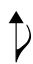

Upwards triangle note head:  
as high as possible  
Downwards triangle note head:  
as low as possible

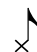

Crossed note head:  
non-pitched note

For my Godson, Aodhán

# God calls Samuel

written in collaboration with theologian Caleb Froehlich,  
for TheoArtistry Scheme, Institute for Theology, Imagination, and the Arts, University of St Andrews.

1 Samuel 3

Seán Doherty

**Moderato** ♩ = 70

like the wind (non-pitch)

**ppp** *p lontano*

SOPRANO

Alto

TENOR

BASS

Pedals

**pp**

==

6 *p semplice, quasi recitativo*

S. Solo

S.

A.

T.

B.

Org.

Ped.

**mp** *pp* **ppp**

el. come sopra

Arpeggiate RH chord at random, as fast as possible

**ppp**

**p**

11

S. Solo

El - i? Hi-ne ni, Hi-ne ni, El-i.

S. *mp* *mf* *p* *ppp sub.* *mf*

[S]a - mu - el, Sa - mu - el. Sss [S]a - mu -

A. *mp* *mf* *p* *ppp sub.* *mf*

[S]a mu - el, Sa - mu - el. Sss [S]a-sa sa - mu-

T. *mp* *mf* *p* *ppp sub.* *mf*

[S]a - mu - el, Sa - mu - el. Sss [S]a - sa-sa-mu-

B. *mp* *mf* *p* *ppp sub.* *mf*

[S]a - mu - el, Sa - mu - el. Sss [S]a - sa - mu

Org. *p* *p*

Ped. *mp*

18

S. Solo

El - i? Hi - ne - ni, Hi-ne-ni, Hi ne-ni, El - i.

S. *f* *ppp sub.*

el, Sa - mu - el. Sss

A. *f* *ppp sub.*

- el, Sa - sa - sa - sa - sa - sa - mu - el. Sss

T. *f* *ppp sub.*

el, Sa - sa - sa - sa - mu - el. Sss

B. *f* *ppp sub.*

el, Sa - sa - mu - el. Sss

Org. *mf*

Ped. *mf*

22

S. Solo

S. *f* [S]a - - mu - - el, Sa - - mu -

A. *f* [S]a - sa - sa-sa-sa - sa - mu - el. Sa-sa-sa - sa - [S]a - sa - sa-sa-sa - sa - mu -

T. *f* Sa - - sa - sa-sa-sa - mu - el Sa - sa - - sa - sa-sa-sa - mu -

B. *f* [Sa] sa-sa - sa - - mu - el. Sa-sa-sa - sa - - sa - mu -

Org.

Ped.

25

S. Solo

S. *ff* *p* Da - ber - ki sho - me - a ab - de - cha

A. *ff* *p* el.

T. *ff* *p* el.

B. *ff* *p* el.

Org. *f* non trem.

Ped.

29

*f* *ff* *f* *ff*

S. *El!!* *El - i.* *El!!* *El - i.* *El - i.*

A. *El!!* *El - i.* *El!!* *El - i.* *El - i.*

T. *El!!* *El - i.* *El!!* *El - i.* *El - i.*

B. *El!!* *El - i.* *El!!* *El - i.* *El - i.*

Org. *f*

Ped.

33

*f* *ff* *f* *ff* *fff* *fff* *fff* *fff*

S. *El!!* *El - i.* *El - i.* *El - i.* *El!!* *El - i.* *El - i.* *El!!* *El i.*

A. *El!!* *El - i.* *El - i.* *El - i.* *El!!* *El - i.* *El - i.* *El!!* *El i.*

T. *El!!* *El - i.* *El - i.* *El - i.* *El!!* *El - i.* *El - i.* *El!!* *El i.*

B. *El!!* *El - i.* *El - i.* *El - i.* *El!!* *El - i.* *El - i.* *El!!* *El i.*

Org.

Ped.

[illegible]

43

S. Solo

i! \_\_\_\_\_ El - i! \_\_\_\_\_ El - i! El - i! El - i! El - i! El -

*fff* unmeasured trem., like an ululation

S.

measured trem.

*fff* El i, El i, etc. ||:El i :||

A.

El - i, El - i, etc. ||:El i :||

*fff*

T.

El! El! El! El! El! El! El! El! El! El!

*fff* like a bark

B.

El! El!

come sopra

Org.

*fff*

Ped.

46

S. Solo

i! \_\_\_\_\_ El - i! \_\_\_\_\_ El -

S.

A.

T.

El!

B.

El! El! El! El! El! El! El! El!

Org.

Ped.

*p sub.* \_\_\_\_\_ *pp* \_\_\_\_\_ *ppp* \_\_\_\_\_ *pppp*



Meno mosso ♩ = 60

7

51 *p semplice* **molto rit.** . . . . .

S. Solo El - i? Hi - ne - ni, El - i.

S. *p semplice* like a hush *ppp*  
Sa - mu - el? Shh sh sh sh, Sa - mu - el.

A. *p semplice* like a hush *ppp*  
Sa - mu - el? Shh sh sh sh, Sa - mu - el.

T. *p semplice* like a hush *ppp*  
Sa - mu - el? Shh sh sh sh, Sa - mu - el.

B. *p semplice* like a hush *ppp*  
Sa - mu - el? Shh sh sh sh, Sa - mu - el.
