# Supplementary material
Source: MDPI journal article supplement (https://www.mdpi.com/2077-1444/9/1/7)
Supplement: s1 [file s1]

# The Silent Word Sounds

Lisa Robertson

$\text{♩} = 70$

Soprano 1

Go up to the moun- tain be-fore me

Soprano 2

Go up to the moun- tain be-fore me

Alto 1

*mp cresc.* *mf* *f*

El - i - ya - hu El - i - ya - hu Go up to the moun- tain be-fore me

Alto 2

*mp cresc.* *mf* *f*

El - i - ya - hu El - i - ya - hu Go up to the moun- tain be-fore me

Tenor 1

*mp cresc.* *mf* *f*

El - i - ya - hu El - i - ya - hu Go up to the moun- tain be-fore me

Tenor 2

*mp cresc.* *mf* *f*

El - i - ya - hu El - i - ya - hu Go up to the moun- tain be-fore me

Bass 1

*mp cresc.* *mf* *f*

El - i - ya - hu El - i - ya - hu Go up to the moun- tain be-fore me

Bass 2

*mp cresc.* *mf* *f*

El - i - ya - hu El - i - ya - hu Go up to the moun- tain be-fore me

6

S. 1 *p* *shaken* *p* *weakened*  
your God My God is not in the wind My

S. 2 *p* *shaken* *p* *weakened*  
your God My God is not in the wind My

A. 1 *p* *shaken* *p* *weakened*  
your God My God is not in the wind My

A. 2 *p* *shaken* *p* *weakened*  
your God My God is not in the wind My

T. 1 *f* *mighty* *f* *tremendous*  
your God Now there was a great wind and af-ter the wind an earth-quake

T. 2 *f* *mighty* *f* *tremendous*  
your God Now there was a great wind and af-ter the wind an earth-quake

B. 1 *> mf < f* *mighty* *f* *tremendous*  
your God there was a great wind and af-ter the wind an earth quake

B. 2 *> mf < f* *mighty* *f* *tremendous*  
your God there was a great wind and af-ter the wind an earth-quake

\*the large X indicates body percussion (tap leg with hand) This always occurs on the downbeat of the bars indicated.

11

S. 1  
 — God is not in the earth-quake **X** *p broken* My — God is not in the fire —

S. 2  
 — God is not in the earth-quake **X** *p broken* My — God is not in the fire —

A. 1  
 God is not in the earth-quake **X** *p broken* My — God is not in the fire —

A. 2  
 — God is not in the earth-quake **X** *p broken* My — God is not in the fire —

T. 1  
**X** *f shattering* and — af - ter the earth-quake a fire **X** *f fierce* and

T. 2  
**X** *f shattering* and af - ter the earth-quake a fire **X** *f fierce* and

B. 1  
**X** *f shattering* and — af - ter the earth-quake a fire **X** *f fierce* and

B. 2  
**X** *f shattering* and — af - ter the earth-quake a fire **X** *f fierce* af -

16

S. 1 *f* *mf* solo with a still, small voice  
The Fath -

S. 2 *f* fire

A. 1 *f* *pp* whisper, no pitch  
a soft whisper of a gentle breeze *p*  
li, li, li, li, li, li, li, li,

A. 2 *f* *pp* whisper, no pitch  
a soft whisper of a gentle breeze  
eh, eh, eh,

T. 1 *f* af - ter the fire *pp* whisper, no pitch  
a soft whisper of a gentle breeze *p* *pp*  
li, li, li,

T. 2 *f* af - ter the fire *pp* whisper, no pitch  
a soft whisper of a gentle breeze *p* *pp*  
eh, eh,

B. 1 af - ter the fire

B. 2 - ter the fire

21

S. 1  
er spoke one word His

S. 2  
solo  
*mf with a still, small voice*  
ther spoke one word

A. 1  
*pp*  
li, li, when  
*mf with a still, small voice*

A. 2  
*p*  
eh, eh  
*pp*

T. 1  
*p*  
li, li, li, li, li, li, li, li,  
*pp*

T. 2

B. 1  
whisper, no pitch  
a soft whisper of a gentle breeze  
*pp*  
li,  
*p*

B. 2  
whisper, no pitch  
a soft whisper of a gentle breeze  
*pp*  
eh, eh, eh, eh, eh, eh, eh, eh,  
*p*

24

S. 1  
Son qui - et sil

S. 2

A. 1  
all was in

A. 2  
solo  
*mf with a still, small voice*  
was in

T. 1  
*pp* *p*  
li, li, li, li, li, li, li, li,

T. 2  
*pp* *p*  
eh, eh, eh, eh, eh, eh, eh, eh,

B. 1  
*pp* *p*  
li, li,

B. 2  
*pp* *p*  
eh, eh,

27

S. 1  
ence leapt down

S. 2  
sil - ence leapt down in

A. 1  
The Al - might-y word

A. 2  
might - y word

T. 1  
li, li

T. 2  
—eh, eh, eh, eh, eh, eh,

B. 1  
li, li, li, li, li, li, li, li,

B. 2  
eh, eh, eh, eh, eh, eh,

*pp* *p* *pp* *pp* *pp*

The musical score is written for eight voices and four instruments. The vocal parts (Soprano 1, Soprano 2, Alto 1, Alto 2, Tenor 1, Tenor 2, Bass 1, Bass 2) are in treble clef with a key signature of one sharp (F#). The instrumental parts (Tenor 1, Tenor 2, Bass 1, Bass 2) are in bass clef. The score is in 3/4 time. The lyrics are: S. 1: 'ence leapt down; S. 2: 'sil - ence leapt down in; A. 1: 'The Al - might-y word; A. 2: 'might - y word; T. 1: 'li, li, li; T. 2: '—eh, eh, eh, eh, eh, eh,; B. 1: 'li, li, li, li, li, li, li, li,; B. 2: 'eh, eh, eh, eh, eh, eh,; Dynamic markings include *pp* (pianissimo) and *p* (piano).

[illegible]



35

S. 1  
sil-ence  
lo, lo, lo, lo, lo, lo, lo, lo,

S. 2  
—  
eh, eh, eh, eh, eh, eh, eh, eh,

A. 1  
eh, eh, eh, eh, eh, eh, eh, eh,

A. 2  
ence  
lo, lo,

T. 1  
your God  
El - o - him El - o-him

T. 2  
God  
El - o - him

B. 1  
li  
El - o - him El - o - him

B. 2  
El - o - him El - o - him

38 *pp* *mp*

S. 1 lo, lo, moun - tain

S. 2 — eh, eh, — eh, moun tain,

A. 1 eh, eh, eh, lo, lo, lo,

A. 2 lo, lo, lo, lo, eh, eh, eh, eh,

T. 1 2 voices 3 moun - tain

T. 2 2 voices 8 My be - lov - ed

B. 1 *mp* moun - tain moun - tain

B. 2 *mp* moun - tain, moun - - - tain, moun-tain

40 solo

S. 1 Here is your God

S. 2 Here is your God

A. 1 lo, lo, lo, lo, lo, lo, lo, lo, *p* *pp*

A. 2 eh, *p* *pp*

T. 1 night at the time

T. 2 the tran - quil night time of

B. 1 night, night at at time, time

B. 2 night, night, night at, at, at time, time, time,

42

S. 1  
dawn, dawn Here is your God

S. 2  
dawn Here is your God

A. 1

A. 2

T. 1  
ris - ing sound - ing sound ing

T. 2  
dawn sound sound sound sol-i - tude

B. 1  
ris - ing dawn, dawn sound - - ing sol - i - tude

B. 2  
time, time, time, dawn sil - ent mus - ic

tutti

tutti

tutti

45 *tutti*

S. 1 My be-lov ed Go up to the moun -

S. 2 moun tain Go up to the moun -

A. 1 *mp cresc.* 3 *mf* *f* El - i - ya - hu El - i - ya - hu Go up to the moun -

A. 2 *mp cresc.* 3 *mf* *f* El - i - ya - hu El - i - ya - hu Go, go go go, go go, to the moun

T. 1 *mp cresc.* *mf* *f* El - i - ya - hu El - i - ya - hu Go up to the moun -

T. 2 *mp cresc.* *mf* 3 *f* El - i - ya - hu El - i - ya - hu Go up to the moun -

B. 1 *mp cresc.* *mf* *f* El - i - ya - hu El - i - ya - hu Go, go go go, go to, to,

B. 2 *mp cresc.* *mf* *f* El - i - ya - hu El - i - ya - hu Go, go go go, go go, to the moun

48

S. 1  
tain say to the peo - ple. Here\_\_ is your God

S. 2  
tain say to the peo - ple Here\_\_ is your

A. 1  
tain say to the peo - ple Here\_\_ is your

A. 2  
- tain, go, go, go, go, go, go go, go go, go, go, go, go, go, peo-ple, peo-ple, peo-ple Here\_\_ is\_\_ your

T. 1  
tain say to the peo - ple Here\_\_ is\_\_ your

T. 2  
tain say to the peo - ple Here\_\_ is\_\_ your

B. 1  
the, the, moun - tain say to the peo - ple Here\_\_ is\_\_ your

B. 2  
- tain, go, go, go, go, go, go, go, go say to the peo-ple, peo-ple, peo-ple Here\_\_ is your

*mp*

[illegible]

56

S. 1

your God

S. 2

your God

A. 1

your

*pp* li, li, li, li, li,

A. 2

your

*pp* eh, eh, eh, eh, eh, eh, eh,

T. 1

li, li, li, li, li, li, li, li, li, li,

T. 2

breath sounds

eh, eh,

B. 1

breath sounds

*pp* eh, eh,

B. 2

lo, lo,



58

S. 1

S. 2

A. 1

A. 2

T. 1

T. 2

B. 1

B. 2

*pp* *p* *pp*

li, li, li, li, li, li

eh, eh, eh, eh, eh, eh, eh, eh

li, li

eh, eh, eh

eh, eh, eh, eh

lo, lo, lo, lo
