# Supplementary material
Source: MDPI journal article supplement (https://www.mdpi.com/2077-1444/9/1/7)
Supplement: s1 [file s1]

# Whilst falling asleep, Savta told me of Jacob

Emily Dickinson

Dominic de Grande

**Solo Human Whistle**

$\text{♩} = 85$   
*mp* *mf* *mp*  
*poco rubato* *enjoy the pauses,* *p < mf* *f* *pp < mp*  
*playfully* *senza vibrato* *vary them in length*  
*inquisitively* *a little...*

**SOPRANO**

*mp < mf mp* *pp < mp*  
A\_\_ a a a\_\_ a, a\_\_ a a a\_\_ a a  
*senza vibrato*  
*poco rubato* (A as in A little)

**ALTO**

*senza vibrato*

**TENOR**

*senza vibrato*

**BASS**

*senza vibrato*

**Organ**

$\text{♩} = 85$

**Pedals**

*poco rall..*

7

*mp* < *mf*

*tempo giusto*

*pp* *mp*

*(as if catching out the sop)*

*tempo giusto*

*pp* *solo mp*

a\_\_ a a a\_\_ a a a\_\_ a, A\_\_\_\_\_ li - ttle east of

*senza vibrato solo mp*

A li - ttle east of

*poco rall..*

*♩ = 85*

14

The musical score is written for a song. It begins with a treble clef staff at measure 14, which contains a melodic line with a comma above the first measure and a repeat sign at the end of the first phrase. Below this, there are two vocal staves, each with a treble clef and the same lyrics: "Jor - don, e - van - ge - lists re - cord, A Gym - nyst and an an - gel, did wre - stle with the". The piano accompaniment consists of three systems of staves. The first system has a single treble clef staff with a whole rest in each of the six measures. The second system has a grand staff (treble and bass clefs) with whole rests in all four staves for each of the six measures. The third system has a single bass clef staff with whole rests in each of the six measures.

Jor - don, e - van - ge - lists re - cord, A Gym - nyst and an an - gel, did wre - stle with the

Jor - don, e - van - ge - lists re - cord, A Gym - nyst and an an - gel, did wre - stle with the

20 , *poco rall.* ♩ = 85

*f*

*little slower*, *mp tutti* *mp tutti* *mp* *mp* *mp*

lord. did wre-stle with the Lord. Till morn - ing

*mp tutti* *little slower* *mp tutti* *mp* *mp*

lord. did wre-stle with the Lord. Till morn - ing

*mp tutti* *little slower* *mf solo*

*senza vibrato* did wre-stle with the Lord. Till mor - ning tou - ching moun - tain, and

*senza vibrato*, *mp tutti* *little slower* *mf solo*

did wre-stle with the Lord. Till mor - ning tou - ching moun - tain, and

*poco rall.* ♩ = 85

*mp 16'*

(thick bass tone) < *sf* > < *sf* >

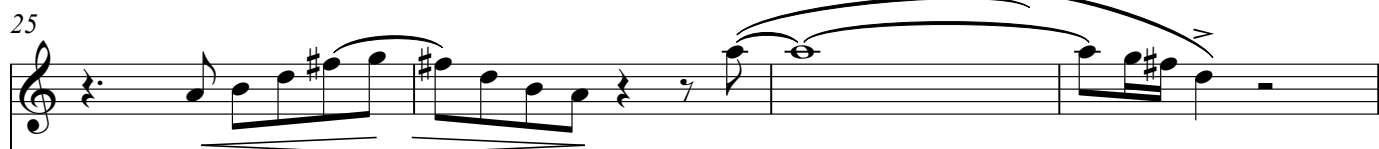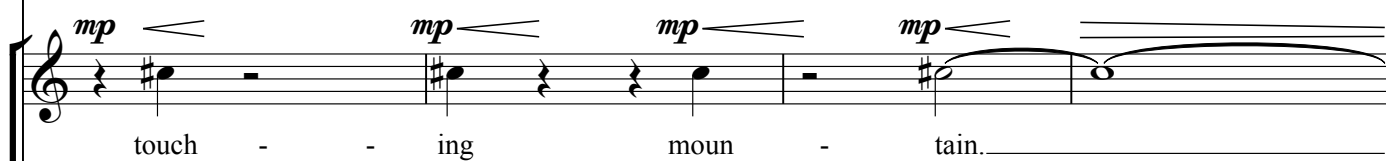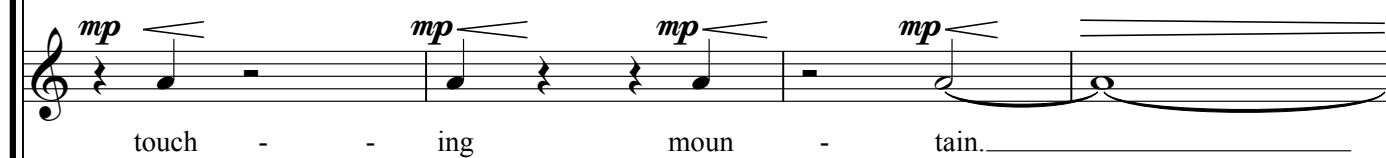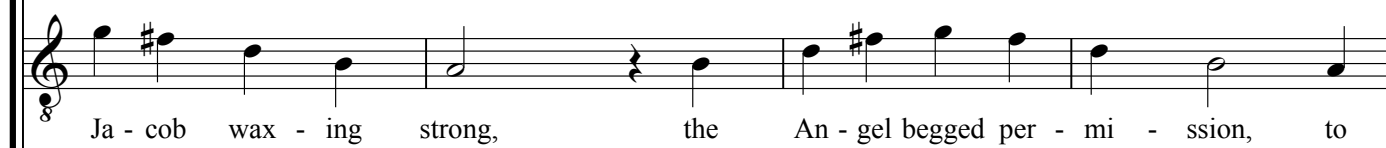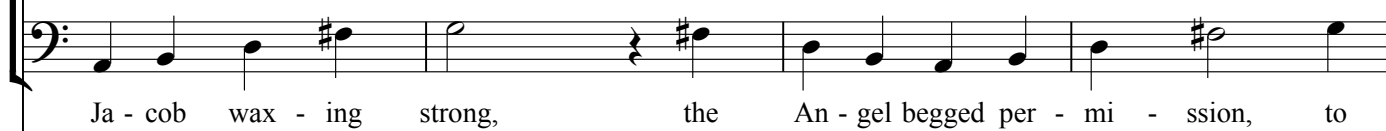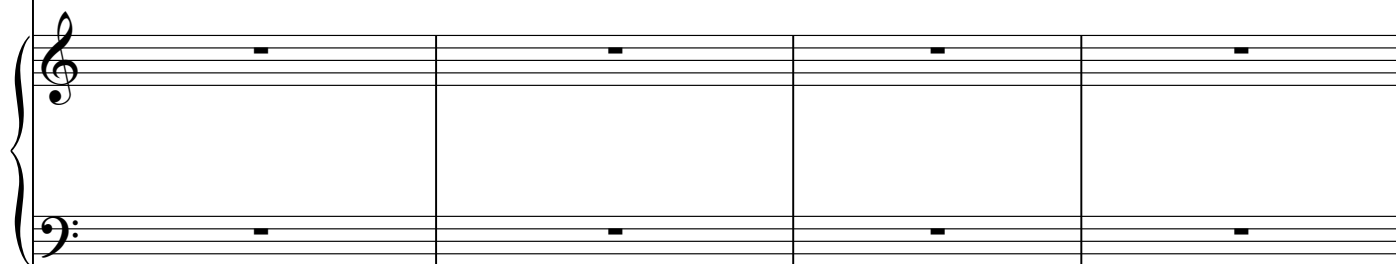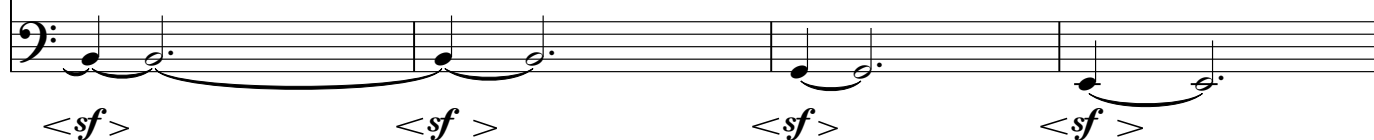

29 *poco rall.*

♩ = 85

Musical score for vocal and piano parts, measures 29-34. The tempo is *poco rall.* (♩ = 85). The key signature has one sharp (F#). The vocal parts (Soprano, Alto, Tenor) and the piano part (Right and Left Hand) are shown. The lyrics are: "to break-fast to re - turn. Not". The piano part includes the instruction *mf tutti* and *a little slower*.

Soprano: *mf tutti* *a little slower* to break-fast to re - turn. Not  
 Alto: *mf tutti* *a little slower* to break-fast to re - turn. Not  
 Tenor: *mf tutti* *a little slower* break - fast to re - turn. to break-fast to re - turn.  
 Piano (RH): *mf tutti* *a little slower* break - fast to re - turn. to break-fast to re - turn.  
 Piano (LH): *mf tutti* *a little slower* break - fast to re - turn. to break-fast to re - turn.

*poco rall.*

♩ = 85

Musical score for piano part, measures 35-40. The tempo is *poco rall.* (♩ = 85). The key signature has one sharp (F#). The piano part (Right and Left Hand) is shown. The lyrics are: "still gentle timbre". The piano part includes the instruction *mp* and *still gentle timbre*.

Piano (RH): *mp* *still gentle timbre*  
 Piano (LH): *mp* *still gentle timbre*

35

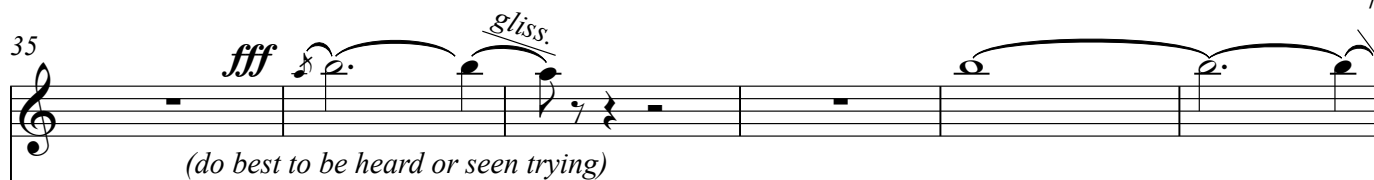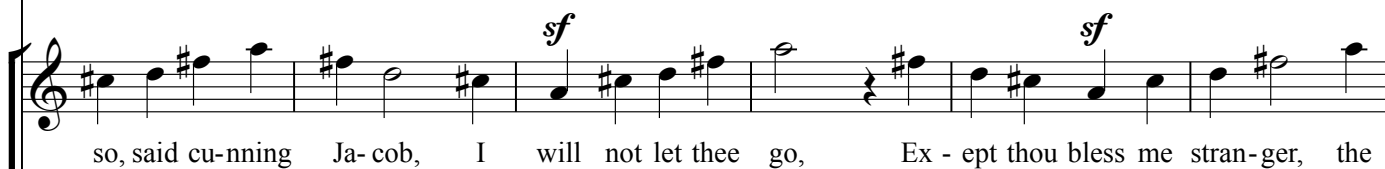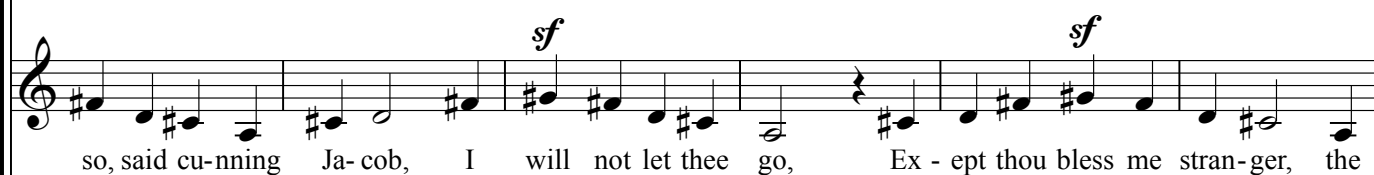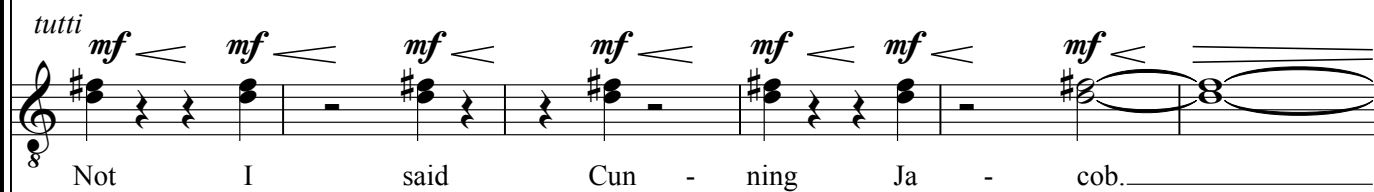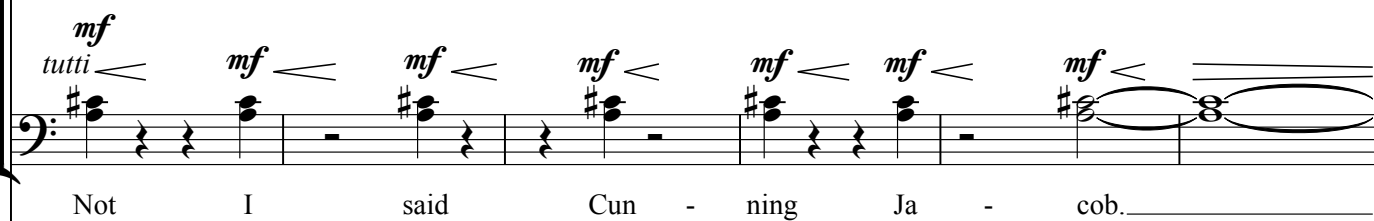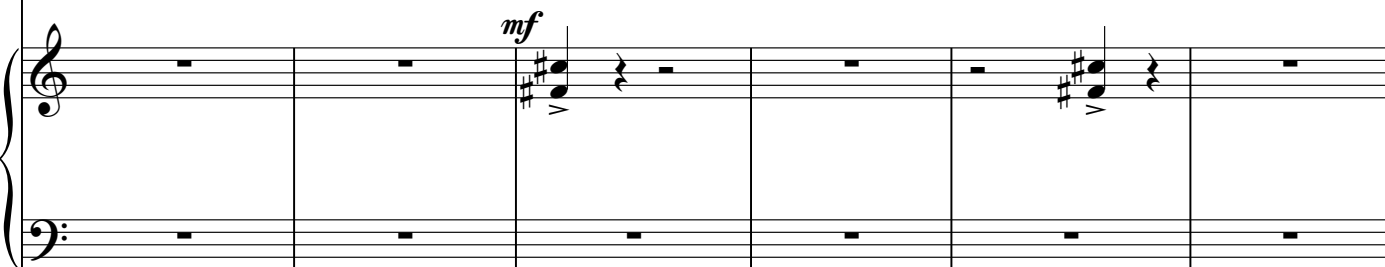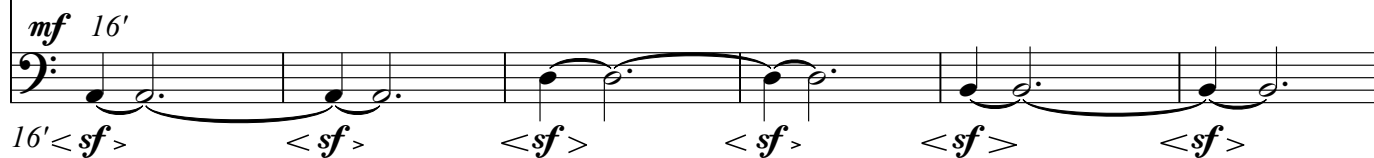

41  $\text{♩} = 80$

which ac - ce - ded to. *sf* bursting *fff* LET ME GO, FOR THE DAY IS

which ac - ce - ded to. *sf* bursting *fff* LET ME GO, FOR THE DAY IS

LET ME GO, FOR THE DAY IS bursting *fff*

LET ME GO, FOR THE DAY IS bursting *fff*

$\text{♩} = 80$  bursting *fff*

*<sf>* (10 sec build) enjoy the build...



49  $\text{♩} = 85$  *poco rubato* *mp*

give it time! *mf*

*poco rubato* same as at beginning,  
play with the spaces between  
*mp* each phrase *mf*

BREA - - KING.\_\_\_\_\_ give it time! *solo* Light swung the sil-ver flee-ces "Pe-

BREA - KING.\_\_\_\_\_

BREA - KING.\_\_\_\_\_

BREA - KING.\_\_\_\_\_

$\text{♩} = 85$

10

57

*f* *mf* *mp* *f* *mp* *mp*

*tempo giusto*

*senza vibrato*

ni - el" hill be - yond, and the be-wil-dered Gym - nast, found he had wor-sted Go\_\_\_\_\_

*ppp tutti*

that he had\_

*ppp*

that he had\_

*ppp*

that he had\_

*3/4*

*3/4*

*3/4*

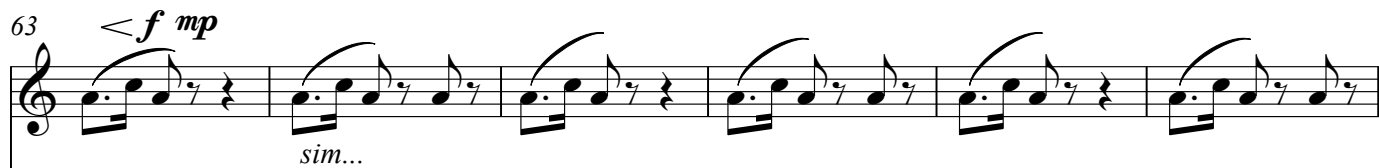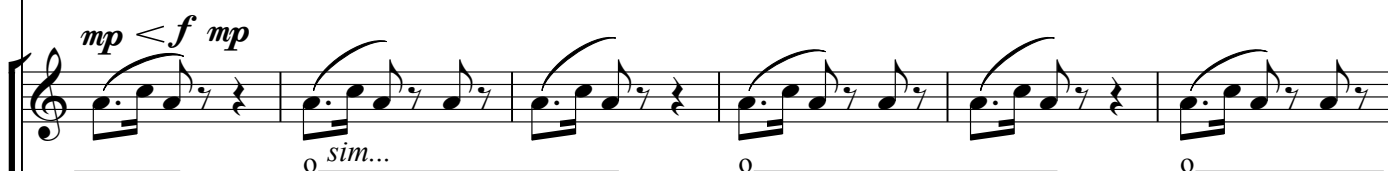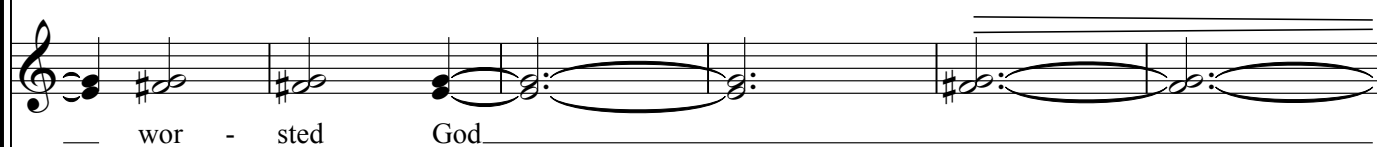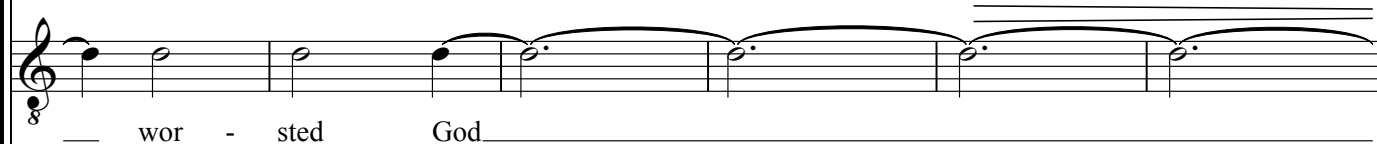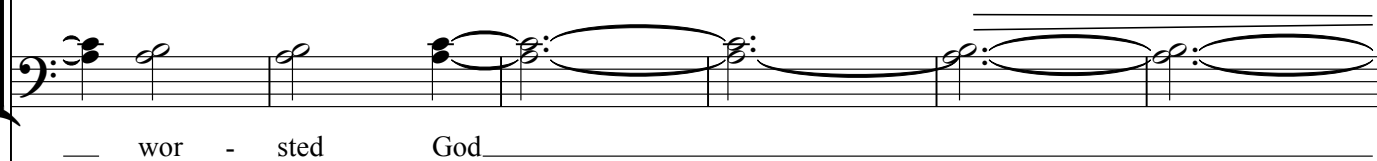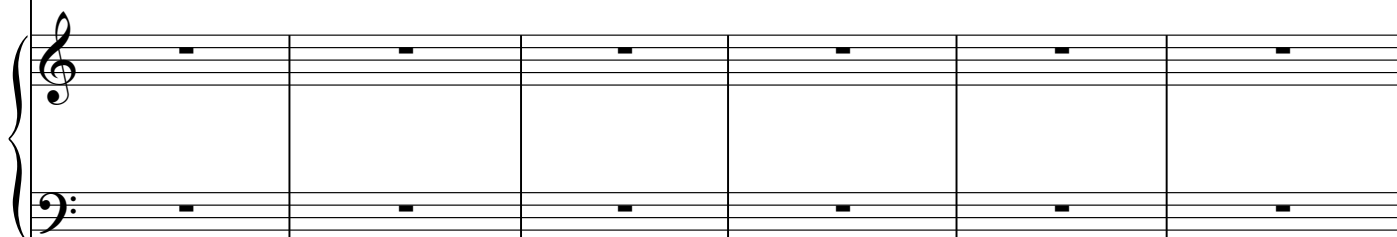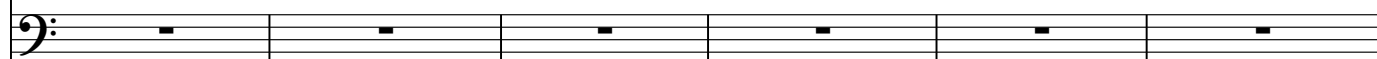

**poco rall..**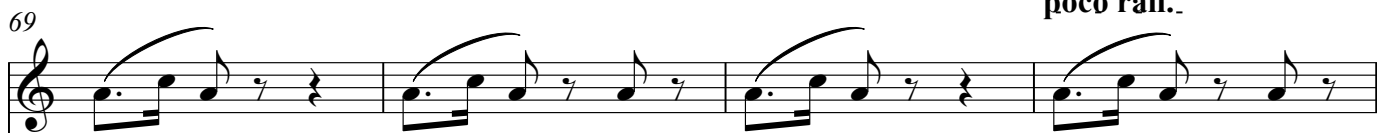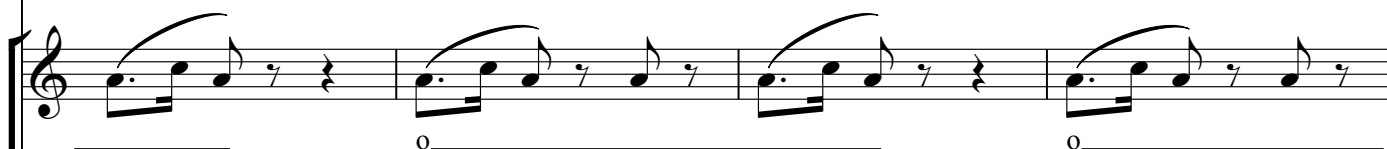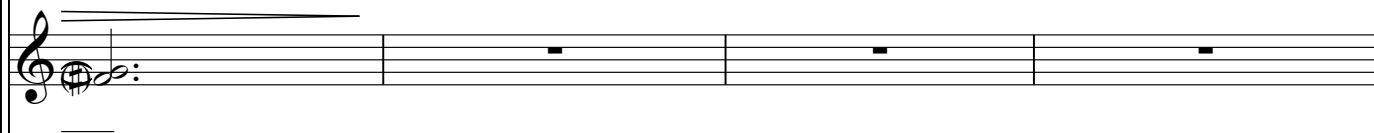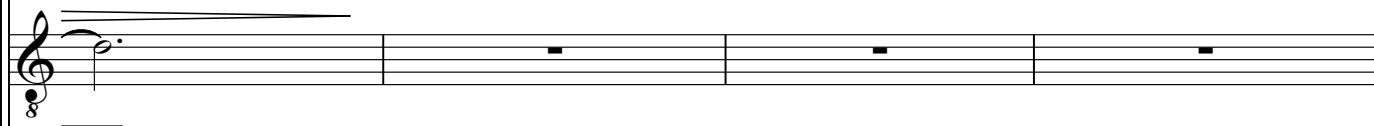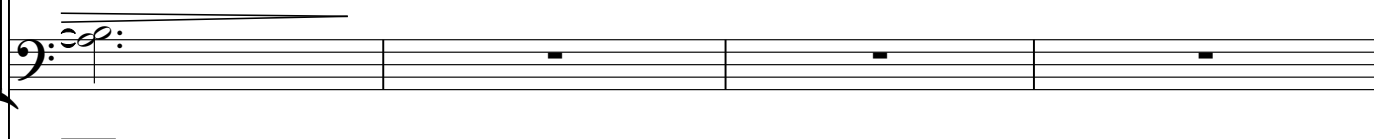**poco rall..**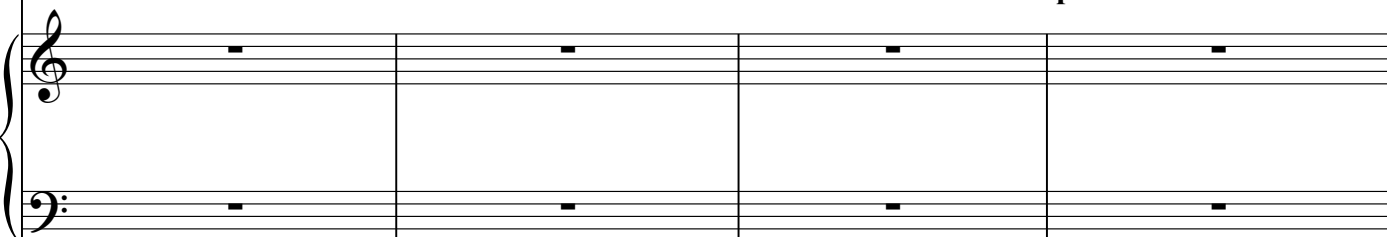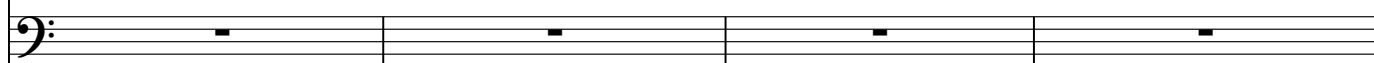

73

This musical score is for a piano and voice piece, page 13. It features a piano accompaniment and a vocal line. The piano part consists of five staves: two for the right hand and three for the left hand. The vocal line is on a single staff. The music is in 4/4 time and begins at measure 73. The piano accompaniment is mostly silent, with rests in all staves. The vocal line has a melody in the first two measures, followed by a rest in the third measure, and then a final note in the fifth measure. The lyrics "Go" and "d." are written under the vocal line. The dynamic marking *mf* is present in the first measure of the vocal line.

73

*mf*

Go d.
