# Supplementary material
Source: MDPI journal article supplement (https://www.mdpi.com/2077-1444/9/1/7)
Supplement: s1 [file s1]

## Exodus III

For members of the TheoArtistry Scheme,  
St Salvator's Chapel Choir and Tom Wilkinson.

♩=100 Flickering  
[Flutes 8']

Organ

*mp* *mf*

5

Soprano

S/A I  
II  
III

*p* *misterioso* *mp* *mf* *pp*

Mo - ses, Mo - ses, Here I am - mm

Alto

*p* *legato* *mp* *mf* *pp*

Mo - ses, Mo - ses, Here I am - mm

Organ

*p* *legato* *mp* *mf* *pp*

9

Organ

*mp*

13

Soprano *p* Mo - ses, *mp* Mo - ses, *mf* Here I *f* a - m *mp*

Alto *p* Mo - ses, *mp* Mo - ses, *mf* Here I *f* a - m *mp*

Organ *mf* *f*

Mo - ses, Mo - ses, Here I a - m

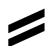

17

Soprano *p* Draw not nigh

Alto *p* Draw not nigh

Organ *mf* *mp*

Draw not nigh Draw not nigh

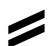

21

Soprano *mp* hi - ther: put off thy shoes from off thy feet, *mf* *mp*

Alto *mp* hi - ther: put off thy shoes from off thy feet, *mf* *mp*

Organ *mf*

hi - ther: put off thy shoes from off thy feet, hi - ther: put off thy shoes from off thy feet,

25 *mf*

Soprano  
for the place where-on thou stand - est\_\_ is ho - - ly

Alto  
*mf*  
for the place where-on thou stand - est\_\_ is ho - - ly

Organ

29 *f*

Soprano  
ground.

Alto  
*f*  
ground.

Organ  
*f*

33 *mf* *f* *mf* *f*

Soprano solo  
I am the God\_\_ of thy fa - ther, the God of A - bra-ham, the\_\_

Organ  
*mf*

Pedals

37 *poco rit.* *f* *mp*  $\text{♩} = 90$

Soprano solo

God of I - saac, and the God of Ja - cob. mm I have

Organ

Pedals

Swell Strings 8' + Voix celeste 8'

41 *f* *mf* *mp*

Soprano solo

sure - ly seen the af - flic - tion of my peo - ple\_ which are in E - gypt, and have

Organ

45 *p*

Soprano solo

heard their cry\_ by re - ason of their task - mas - ters; for I know their

Organ

♩=95 poco accel.

*p*

Soprano solo

sor - rows;

*mp* *mf* *mf*

I am come down to de - li - ver them out of the

Organ

*mf*

53

*f* *mp* *cresc. poco a poco* *3*

Soprano solo

hand of the E - gyp - tians

I will send thee un - to Pha - raoh, that thou may-est

Organ

*f* *mp* *cresc. poco a poco*

57

*poco rit.* *marcato* *3* *(f)* *legato*

Soprano solo

bring forth my peo - ple the chil-dren of I - sra - el out of E - -

Organ

61 **A tempo** ♩=100

Soprano solo

gypt. *mp* *mf* *f*

Tenor

T/B I  
II  
III

Who am I? Who am I? Who am I?

Bass

Who am I? Who am I? Who am I?

Flutes 8'

Organ *mf*

Pedals

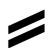

65 **poco rit.**

Organ

Pedals

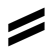

69 **A tempo** ♩=90

Baritone solo

*mf* legato but rhythmic / marcato

Who am I, that I should bring forth the chil-dren of

Swell Strings 8'

Organ *mp* *mf*

Pedals

73

Baritone Solo

*risoluto* *poco accel.* *f* *mp*

I - sra - el out of E - gypt? they shall say to me, What is his name? mm

Organ

Pedals

77  $\text{♩} = 100$

Baritone Solo

Soprano *mp* *ma risoluto*

Alto *mp* *ma risoluto*

Tenor *risoluto* *mf* *f*

What is his name? mm

Organ *mf* *f* *ff*

Pedals

Swell Strings 8' + Voix celeste 8'

Soprano solo

81 *f* *Ethereal with as little vibrato as possible*

Soprano solo

I Am That I Am

Soprano

Alto

Organ *mp*

85 *poco rit. con rubato*

Soprano solo

I Am hath sent me un - to you I will

Soprano

Now let us go

Alto

Now let us go

Organ *poco rit. con rubato*

Swell Strings 8' + Voix celeste 8'

*mp*

89 *A tempo*  $\text{♩} = 100$  *f*

Soprano solo

lift you up I will lift you up out of the a -

Soprano

Now let us go Now let us go

Alto

Now let us go Now let us go

Organ *mf*

Flutes 8'



93

Soprano solo

flic - tion of E - gypt.

*p*

Soprano

*mf* *f* *mf* *mf* *f* *mf*

Now let us go Now let us go

Alto

*mf* *mp* *mf* *f* *mf* *mp*

go Now let us go Now let us

Tenor

*mf* *f* *mf*

Now let us go

*mp*

Now let us

Organ

*mf*

Pedals

97

Soprano

*mf* *f* *mf* *p*

Now let us go

Alto

*mf* *mp* *mp* *mf* *p*

go Now let us go

Tenor

*mf* *f* *mf* *p*

Now let us go

*mf* *mp* *mp* *mf* *p*

go Now let us go

Organ

*mp* *mf* *mp*

Pedals

rit. . . . .

101

Organ

Pedals

*p*

This musical score is for measures 101 through 104. It features two staves: 'Organ' (treble clef) and 'Pedals' (bass clef). The key signature has two flats (B-flat and E-flat).  
Measure 101: The Organ staff begins with a half note chord (B-flat 4, E-flat 5) followed by a dotted half note chord (B-flat 4, E-flat 5, A-flat 6). The Pedals staff has a half note (B-flat 1) tied to the next measure.  
Measure 102: The Organ staff has a half note chord (B-flat 4, E-flat 5) tied to the next measure. The Pedals staff has a half note (E-flat 2) tied to the next measure.  
Measure 103: The Organ staff has a half note chord (B-flat 4, E-flat 5) tied to the next measure. The Pedals staff has a half note (B-flat 1) tied to the next measure.  
Measure 104: The Organ staff has a half note chord (B-flat 4, E-flat 5) tied to the next measure. The Pedals staff has a half note (E-flat 2) tied to the next measure. The piece concludes with a double bar line. A dynamic marking of *p* (piano) is placed at the end of the Organ staff.
